# Supplementary material for: Proteomic investigation of human skeletal muscle before and after 70 days of head down bed rest with or without exercise and testosterone countermeasures
Source: PubMed Central journal article supplement (PMC6563988; doi:10.1371/journal.pone.0217690), 2019-06-13
Supplement: pone.0217690.s001.pdf [file pone.0217690.s001.pdf]

**S1 Table, Gene Ontology.** Proteoforms that showed significant PRE-POST abundance changes in Table 1 were submitted for Enrichment Analyses (Annotation Version and Release Date: GO Ontology database Released 2018-08-09, <http://www.geneontology.org/>,). Tables below include only results with False Discovery Rate < 0.05. **A. CON, B. PEX, C. TEX**

**A. CON:** P00568, Q9UBY9, P07451, F8VVX2, P07951, Q9UKX2, F8VVX2, Q9GZV1, P68104, P69905, P04792, Q6ZMU5, P68871, Q9UKX2, P63267, E9PEX6, B2RCS5, F8VVX2, P69905, F8VVX2, P69905, P69905, P35908, P16219, P69905, P31415, F8WCL5 (*Unmapped*)

## BIOLOGICAL PROCESS

| <u>Homo sapiens</u><br>GO biological process complete | #          | #        | expected | Fold Enrichment | +/- | raw P value | FDR      |
|-------------------------------------------------------|------------|----------|----------|-----------------|-----|-------------|----------|
| <a href="#">bicarbonate transport</a>                 | <u>36</u>  | <u>3</u> | .03      | > 100           | +   | 2.63E-06    | 1.38E-02 |
| <a href="#">muscle contraction</a>                    | <u>238</u> | <u>5</u> | .17      | 29.47           | +   | 5.37E-07    | 8.45E-03 |
| ↳ <a href="#">muscle system process</a>               | <u>285</u> | <u>5</u> | .20      | 24.61           | +   | 1.28E-06    | 1.01E-02 |

## MOLECULAR FUNCTION

No statistically significant results.

## CELLULAR COMPONENT

| <u>Homo sapiens</u><br>GO cellular component complete          | #          | #        | expected | Fold Enrichment | +/- | raw P value | FDR      |
|----------------------------------------------------------------|------------|----------|----------|-----------------|-----|-------------|----------|
| <a href="#">haptoglobin-hemoglobin complex</a>                 | <u>10</u>  | <u>2</u> | .01      | > 100           | +   | 3.11E-05    | 5.74E-03 |
| <a href="#">hemoglobin complex</a>                             | <u>11</u>  | <u>2</u> | .01      | > 100           | +   | 3.68E-05    | 6.21E-03 |
| ↳ <a href="#">cytosol</a>                                      | <u>507</u> | <u>1</u> | 3.62     | 3.04            | +   | 8.20E-05    | 1.04E-02 |
| ↳ <a href="#">cytoplasmic part</a>                             | <u>964</u> | <u>1</u> | 6.88     | 2.04            | +   | 2.56E-04    | 2.26E-02 |
| ↳ <a href="#">cytoplasm</a>                                    | <u>114</u> | <u>1</u> | 8.19     | 1.83            | +   | 1.23E-04    | 1.38E-02 |
| <a href="#">endocytic vesicle lumen</a>                        | <u>18</u>  | <u>2</u> | .01      | > 100           | +   | 8.93E-05    | 1.07E-02 |
| ↳ <a href="#">organelle part</a>                               | <u>948</u> | <u>1</u> | 6.76     | 2.07            | +   | 1.24E-04    | 1.32E-02 |
| ↳ <a href="#">intracellular organelle part</a>                 | <u>918</u> | <u>1</u> | 6.55     | 2.14            | +   | 8.13E-05    | 1.10E-02 |
| <a href="#">myosin filament</a>                                | <u>22</u>  | <u>2</u> | .02      | > 100           | +   | 1.30E-04    | 1.25E-02 |
| ↳ <a href="#">actin cytoskeleton</a>                           | <u>490</u> | <u>5</u> | .35      | 14.31           | +   | 1.74E-05    | 3.52E-03 |
| ↳ <a href="#">cytoskeleton</a>                                 | <u>216</u> | <u>8</u> | 1.55     | 5.18            | +   | 4.24E-05    | 6.60E-03 |
| ↳ <a href="#">intracellular non-membrane-bounded organelle</a> | <u>419</u> | <u>1</u> | 2.99     | 3.68            | +   | 1.23E-05    | 3.10E-03 |
| ↳ <a href="#">non-membrane-bounded organelle</a>               | <u>420</u> | <u>1</u> | 3.00     | 3.67            | +   | 1.25E-05    | 2.81E-03 |
| ↳ <a href="#">cytoskeletal part</a>                            | <u>167</u> | <u>7</u> | 1.19     | 5.87            | +   | 7.37E-05    | 1.07E-02 |
| <a href="#">I band</a>                                         | <u>139</u> | <u>3</u> | .10      | 30.28           | +   | 1.29E-04    | 1.30E-02 |
| ↳ <a href="#">sarcomere</a>                                    | <u>196</u> | <u>5</u> | .14      | 35.79           | +   | 2.10E-07    | 4.25E-04 |
| ↳ <a href="#">myofibril</a>                                    | <u>217</u> | <u>5</u> | .15      | 32.32           | +   | 3.43E-07    | 2.32E-04 |
| ↳ <a href="#">contractile fiber</a>                            | <u>231</u> | <u>5</u> | .16      | 30.36           | +   | 4.64E-07    | 2.35E-04 |
| ↳ <a href="#">supramolecular fiber</a>                         | <u>958</u> | <u>7</u> | .68      | 10.25           | +   | 1.93E-06    | 7.84E-04 |
| ↳ <a href="#">supramolecular polymer</a>                       | <u>965</u> | <u>7</u> | .69      | 10.18           | +   | 2.03E-06    | 6.86E-04 |
| ↳ <a href="#">supramolecular complex</a>                       | <u>966</u> | <u>7</u> | .69      | 10.17           | +   | 2.04E-06    | 5.92E-04 |

Proteomic Investigation of Human Skeletal Muscle Before and After 70 Days of Head Down Bed Rest With or Without Exercise and Testosterone Countermeasures

|                                           |                     |                   |      |       |   |          |          |
|-------------------------------------------|---------------------|-------------------|------|-------|---|----------|----------|
| ↳ <a href="#">contractile fiber part</a>  | <a href="#">214</a> | <a href="#">5</a> | .15  | 32.78 | + | 3.21E-07 | 3.25E-04 |
| <a href="#">blood microparticle</a>       | <a href="#">143</a> | <a href="#">3</a> | .10  | 29.43 | + | 1.40E-04 | 1.29E-02 |
| <a href="#">extracellular exosome</a>     | <a href="#">209</a> | <a href="#">7</a> | 1.49 | 4.69  | + | 3.05E-04 | 2.58E-02 |
|                                           | <a href="#">5</a>   |                   |      |       |   |          |          |
| ↳ <a href="#">extracellular vesicle</a>   | <a href="#">211</a> | <a href="#">7</a> | 1.51 | 4.64  | + | 3.24E-04 | 2.62E-02 |
|                                           | <a href="#">5</a>   |                   |      |       |   |          |          |
| ↳ <a href="#">extracellular organelle</a> | <a href="#">211</a> | <a href="#">7</a> | 1.51 | 4.64  | + | 3.26E-04 | 2.54E-02 |
|                                           | <a href="#">7</a>   |                   |      |       |   |          |          |

**B. PEX:** Q9UBY9, Q5T8M7, P35241, P07951, P49748, P17661, P07951, H9KVA2, G3V3T0, P09493, P68133, H3BQ84, P35527 (Unmapped)

**BIOLOGICAL PROCESS**

| Homo sapiens                      |             |          |          |                 |     |             |          |
|-----------------------------------|-------------|----------|----------|-----------------|-----|-------------|----------|
| GO biological process complete    | #           | #        | expected | Fold Enrichment | +/- | raw P value | FDR      |
| muscle filament sliding           | <u>38</u>   | <u>4</u> | .01      | > 100           | +   | 9.52E-10    | 7.49E-06 |
| ↳ actin-myosin filament sliding   | <u>38</u>   | <u>4</u> | .01      | > 100           | +   | 9.52E-10    | 1.50E-05 |
| ↳ actin-mediated cell contraction | <u>84</u>   | <u>4</u> | .03      | > 100           | +   | 1.97E-08    | 1.03E-04 |
| ↳ actin filament-based movement   | <u>105</u>  | <u>4</u> | .04      | > 100           | +   | 4.69E-08    | 1.84E-04 |
| ↳ actin filament-based process    | <u>540</u>  | <u>4</u> | .21      | 19.48           | +   | 2.84E-05    | 4.97E-02 |
| ↳ muscle contraction              | <u>238</u>  | <u>4</u> | .09      | 44.21           | +   | 1.15E-06    | 3.02E-03 |
| ↳ muscle system process           | <u>285</u>  | <u>4</u> | .11      | 36.92           | +   | 2.33E-06    | 5.24E-03 |
| supramolecular fiber organization | <u>443</u>  | <u>5</u> | .17      | 29.69           | +   | 2.27E-07    | 7.14E-04 |
| cytoskeleton organization         | <u>1067</u> | <u>5</u> | .41      | 12.33           | +   | 1.67E-05    | 3.29E-02 |

**MOLECULAR FUNCTION**

| Homo sapiens                           |            |          |          |                 |     |             |          |
|----------------------------------------|------------|----------|----------|-----------------|-----|-------------|----------|
| GO molecular function complete         | #          | #        | expected | Fold Enrichment | +/- | raw P value | FDR      |
| structural constituent of cytoskeleton | <u>104</u> | <u>4</u> | .04      | > 100           | +   | 4.51E-08    | 2.10E-04 |
| ↳ structural molecule activity         | <u>815</u> | <u>5</u> | .31      | 16.14           | +   | 4.50E-06    | 6.99E-03 |
| cytoskeletal protein binding           | <u>937</u> | <u>6</u> | .36      | 16.84           | +   | 2.06E-07    | 4.80E-04 |

**CELLULAR COMPONENT**

| Homo sapiens                                   |             |          |          |                 |     |             |          |
|------------------------------------------------|-------------|----------|----------|-----------------|-----|-------------|----------|
| GO cellular component complete                 | #           | #        | expected | Fold Enrichment | +/- | raw P value | FDR      |
| muscle thin filament tropomyosin               | <u>4</u>    | <u>2</u> | .00      | > 100           | +   | 1.89E-06    | 4.27E-04 |
| ↳ contractile fiber part                       | <u>214</u>  | <u>4</u> | .08      | 49.16           | +   | 7.58E-07    | 3.07E-04 |
| ↳ contractile fiber                            | <u>231</u>  | <u>4</u> | .09      | 45.55           | +   | 1.02E-06    | 2.59E-04 |
| ↳ supramolecular fiber                         | <u>958</u>  | <u>5</u> | .36      | 13.73           | +   | 9.90E-06    | 1.34E-03 |
| ↳ supramolecular polymer                       | <u>965</u>  | <u>5</u> | .37      | 13.63           | +   | 1.03E-05    | 1.30E-03 |
| ↳ supramolecular complex                       | <u>966</u>  | <u>5</u> | .37      | 13.61           | +   | 1.03E-05    | 1.23E-03 |
| ↳ intracellular non-membrane-bounded organelle | <u>4197</u> | <u>8</u> | 1.60     | 5.01            | +   | 2.52E-06    | 5.11E-04 |
| ↳ non-membrane-bounded organelle               | <u>4204</u> | <u>8</u> | 1.60     | 5.01            | +   | 2.56E-06    | 4.71E-04 |
| ↳ striated muscle thin filament                | <u>31</u>   | <u>3</u> | .01      | > 100           | +   | 2.14E-07    | 4.35E-04 |
| ↳ actin cytoskeleton                           | <u>490</u>  | <u>5</u> | .19      | 26.84           | +   | 3.72E-07    | 2.52E-04 |
| ↳ cytoskeleton                                 | <u>2168</u> | <u>7</u> | .82      | 8.49            | +   | 9.07E-07    | 2.63E-04 |
| ↳ myofilament                                  | <u>32</u>   | <u>3</u> | .01      | > 100           | +   | 2.34E-07    | 2.38E-04 |
| ↳ myofibril                                    | <u>217</u>  | <u>4</u> | .08      | 48.48           | +   | 8.01E-07    | 2.71E-04 |
| ↳ sarcomere                                    | <u>196</u>  | <u>4</u> | .07      | 53.68           | +   | 5.37E-07    | 2.72E-04 |
| ↳ cytoskeletal part                            | <u>1673</u> | <u>6</u> | .64      | 9.43            | +   | 6.21E-06    | 9.68E-04 |
| stress fiber                                   | <u>61</u>   | <u>2</u> | .02      | 86.24           | +   | 2.44E-04    | 2.60E-02 |
| ↳ actomyosin                                   | <u>74</u>   | <u>2</u> | .03      | 71.09           | +   | 3.55E-04    | 3.27E-02 |
| ↳ contractile actin filament bundle            | <u>61</u>   | <u>2</u> | .02      | 86.24           | +   | 2.44E-04    | 2.75E-02 |
| ↳ actin filament bundle                        | <u>68</u>   | <u>2</u> | .03      | 77.36           | +   | 3.01E-04    | 3.05E-02 |
| actin filament                                 | <u>105</u>  | <u>3</u> | .04      | 75.15           | +   | 7.22E-06    | 1.05E-03 |
| ↳ polymeric cytoskeletal fiber                 | <u>736</u>  | <u>5</u> | .28      | 17.87           | +   | 2.73E-06    | 4.62E-04 |
| cell leading edge                              | <u>394</u>  | <u>3</u> | .15      | 20.03           | +   | 3.47E-04    | 3.35E-02 |

Proteomic Investigation of Human Skeletal Muscle Before and After 70 Days of Head Down Bed Rest With or Without Exercise and Testosterone Countermeasures

C. **TEX:** Q9UBY9, P69905, P35241, Q99584, P02144, P05976, P07951, P68133, P12883, P69905, P68133, P11217, P68133, P68032, H0Y390, P63267 (Unmapped)

## BIOLOGICAL PROCESS

| Homo sapiens                                           |                      |                   |          |                 |     |             |          |
|--------------------------------------------------------|----------------------|-------------------|----------|-----------------|-----|-------------|----------|
| GO biological process complete                         | #                    | #                 | expected | Fold Enrichment | +/- | raw P value | FDR      |
| <a href="#">mesenchyme migration</a>                   | <a href="#">5</a>    | <a href="#">3</a> | .00      | > 100           | +   | 7.91E-09    | 1.78E-05 |
| ↳ <a href="#">tissue migration</a>                     | <a href="#">95</a>   | <a href="#">3</a> | .05      | 55.37           | +   | 2.09E-05    | 2.35E-02 |
| ↳ <a href="#">mesenchyme morphogenesis</a>             | <a href="#">48</a>   | <a href="#">3</a> | .03      | > 100           | +   | 2.90E-06    | 5.07E-03 |
| <a href="#">oxygen transport</a>                       | <a href="#">14</a>   | <a href="#">2</a> | .01      | > 100           | +   | 3.56E-05    | 3.50E-02 |
| <a href="#">skeletal muscle thin filament assembly</a> | <a href="#">14</a>   | <a href="#">2</a> | .01      | > 100           | +   | 3.56E-05    | 3.29E-02 |
| ↳ <a href="#">actin filament-based process</a>         | <a href="#">540</a>  | <a href="#">5</a> | .31      | 16.24           | +   | 7.77E-06    | 1.22E-02 |
| ↳ <a href="#">skeletal myofibril assembly</a>          | <a href="#">16</a>   | <a href="#">2</a> | .01      | > 100           | +   | 4.53E-05    | 3.96E-02 |
| <a href="#">muscle filament sliding</a>                | <a href="#">38</a>   | <a href="#">5</a> | .02      | > 100           | +   | 2.19E-11    | 1.15E-07 |
| ↳ <a href="#">actin-myosin filament sliding</a>        | <a href="#">38</a>   | <a href="#">5</a> | .02      | > 100           | +   | 2.19E-11    | 1.72E-07 |
| ↳ <a href="#">actin-mediated cell contraction</a>      | <a href="#">84</a>   | <a href="#">5</a> | .05      | > 100           | +   | 9.32E-10    | 2.93E-06 |
| ↳ <a href="#">actin filament-based movement</a>        | <a href="#">105</a>  | <a href="#">5</a> | .06      | 83.50           | +   | 2.73E-09    | 7.17E-06 |
| ↳ <a href="#">muscle contraction</a>                   | <a href="#">238</a>  | <a href="#">7</a> | .14      | 51.57           | +   | 2.00E-11    | 3.15E-07 |
| ↳ <a href="#">muscle system process</a>                | <a href="#">285</a>  | <a href="#">7</a> | .16      | 43.07           | +   | 6.86E-11    | 2.70E-07 |
| ↳ <a href="#">system process</a>                       | <a href="#">1890</a> | <a href="#">7</a> | 1.08     | 6.49            | +   | 2.51E-05    | 2.64E-02 |
| <a href="#">cardiac muscle contraction</a>             | <a href="#">74</a>   | <a href="#">3</a> | .04      | 71.09           | +   | 1.01E-05    | 1.45E-02 |
| ↳ <a href="#">striated muscle contraction</a>          | <a href="#">103</a>  | <a href="#">4</a> | .06      | 68.10           | +   | 3.02E-07    | 5.95E-04 |
| ↳ <a href="#">heart contraction</a>                    | <a href="#">84</a>   | <a href="#">3</a> | .05      | 62.63           | +   | 1.46E-05    | 1.91E-02 |
| ↳ <a href="#">heart process</a>                        | <a href="#">95</a>   | <a href="#">3</a> | .05      | 55.37           | +   | 2.09E-05    | 2.53E-02 |

## MOLECULAR FUNCTION

| Homo sapiens                                 |                      |                   |          |                 |     |             |          |
|----------------------------------------------|----------------------|-------------------|----------|-----------------|-----|-------------|----------|
| GO molecular function complete               | #                    | #                 | expected | Fold Enrichment | +/- | raw P value | FDR      |
| <a href="#">oxygen carrier activity</a>      | <a href="#">13</a>   | <a href="#">2</a> | .01      | > 100           | +   | 3.11E-05    | 4.84E-02 |
| <a href="#">cytoskeletal protein binding</a> | <a href="#">937</a>  | <a href="#">6</a> | .53      | 11.23           | +   | 5.82E-06    | 2.71E-02 |
| <a href="#">drug binding</a>                 | <a href="#">1751</a> | <a href="#">7</a> | 1.00     | 7.01            | +   | 1.52E-05    | 3.54E-02 |

## CELLULAR COMPONENT

| Homo sapiens                                                   |                       |                    |          |                 |     |             |          |
|----------------------------------------------------------------|-----------------------|--------------------|----------|-----------------|-----|-------------|----------|
| GO cellular component complete                                 | #                     | #                  | expected | Fold Enrichment | +/- | raw P value | FDR      |
| <a href="#">muscle myosin complex</a>                          | <a href="#">18</a>    | <a href="#">2</a>  | .01      | > 100           | +   | 5.63E-05    | 5.43E-03 |
| ↳ <a href="#">contractile fiber part</a>                       | <a href="#">214</a>   | <a href="#">5</a>  | .12      | 40.97           | +   | 8.68E-08    | 5.87E-05 |
| ↳ <a href="#">cytoplasm</a>                                    | <a href="#">11495</a> | <a href="#">12</a> | 6.56     | 1.83            | +   | 7.84E-04    | 4.41E-02 |
| ↳ <a href="#">contractile fiber</a>                            | <a href="#">231</a>   | <a href="#">5</a>  | .13      | 37.95           | +   | 1.26E-07    | 5.11E-05 |
| ↳ <a href="#">supramolecular fiber</a>                         | <a href="#">958</a>   | <a href="#">5</a>  | .55      | 9.15            | +   | 1.20E-04    | 9.72E-03 |
| ↳ <a href="#">supramolecular polymer</a>                       | <a href="#">965</a>   | <a href="#">5</a>  | .55      | 9.09            | +   | 1.24E-04    | 9.67E-03 |
| ↳ <a href="#">supramolecular complex</a>                       | <a href="#">966</a>   | <a href="#">5</a>  | .55      | 9.08            | +   | 1.25E-04    | 9.36E-03 |
| ↳ <a href="#">intracellular non-membrane-bounded organelle</a> | <a href="#">4197</a>  | <a href="#">10</a> | 2.39     | 4.18            | +   | 4.45E-06    | 8.20E-04 |
| ↳ <a href="#">non-membrane-bounded organelle</a>               | <a href="#">4204</a>  | <a href="#">10</a> | 2.40     | 4.17            | +   | 4.52E-06    | 7.64E-04 |
| ↳ <a href="#">myosin II complex</a>                            | <a href="#">26</a>    | <a href="#">2</a>  | .01      | > 100           | +   | 1.12E-04    | 9.43E-03 |
| ↳ <a href="#">myosin complex</a>                               | <a href="#">68</a>    | <a href="#">3</a>  | .04      | 77.36           | +   | 7.91E-06    | 1.23E-03 |

Proteomic Investigation of Human Skeletal Muscle Before and After 70 Days of Head Down Bed Rest With or Without Exercise and Testosterone Countermeasures

|                                                     |                      |                   |      |       |   |          |          |
|-----------------------------------------------------|----------------------|-------------------|------|-------|---|----------|----------|
| ↳ <a href="#">actin cytoskeleton</a>                | <a href="#">490</a>  | <a href="#">8</a> | .28  | 28.63 | + | 4.22E-11 | 8.56E-08 |
| ↳↳ <a href="#">cytoskeleton</a>                     | <a href="#">2168</a> | <a href="#">8</a> | 1.24 | 6.47  | + | 4.34E-06 | 8.80E-04 |
| ↳↳ <a href="#">cytoskeletal part</a>                | <a href="#">1673</a> | <a href="#">7</a> | .95  | 7.34  | + | 1.13E-05 | 1.52E-03 |
| <a href="#">myosin filament</a>                     | <a href="#">22</a>   | <a href="#">2</a> | .01  | > 100 | + | 8.16E-05 | 7.52E-03 |
| <a href="#">striated muscle thin filament</a>       | <a href="#">31</a>   | <a href="#">2</a> | .02  | > 100 | + | 1.56E-04 | 1.09E-02 |
| ↳ <a href="#">myofilament</a>                       | <a href="#">32</a>   | <a href="#">2</a> | .02  | > 100 | + | 1.65E-04 | 1.12E-02 |
| ↳↳ <a href="#">myofibril</a>                        | <a href="#">217</a>  | <a href="#">5</a> | .12  | 40.40 | + | 9.29E-08 | 4.71E-05 |
| ↳↳ <a href="#">sarcomere</a>                        | <a href="#">196</a>  | <a href="#">5</a> | .11  | 44.73 | + | 5.66E-08 | 5.74E-05 |
| <a href="#">filopodium</a>                          | <a href="#">100</a>  | <a href="#">4</a> | .06  | 70.14 | + | 2.70E-07 | 9.11E-05 |
| ↳ <a href="#">actin-based cell projection</a>       | <a href="#">199</a>  | <a href="#">4</a> | .11  | 35.25 | + | 3.91E-06 | 8.80E-04 |
| <a href="#">stress fiber</a>                        | <a href="#">61</a>   | <a href="#">2</a> | .03  | 57.49 | + | 5.70E-04 | 3.50E-02 |
| ↳ <a href="#">actomyosin</a>                        | <a href="#">74</a>   | <a href="#">3</a> | .04  | 71.09 | + | 1.01E-05 | 1.46E-03 |
| ↳ <a href="#">contractile actin filament bundle</a> | <a href="#">61</a>   | <a href="#">2</a> | .03  | 57.49 | + | 5.70E-04 | 3.61E-02 |
| ↳↳ <a href="#">actin filament bundle</a>            | <a href="#">68</a>   | <a href="#">2</a> | .04  | 51.57 | + | 7.04E-04 | 4.08E-02 |
| <a href="#">actin filament</a>                      | <a href="#">105</a>  | <a href="#">3</a> | .06  | 50.10 | + | 2.79E-05 | 3.54E-03 |
| <a href="#">blood microparticle</a>                 | <a href="#">143</a>  | <a href="#">4</a> | .08  | 49.05 | + | 1.08E-06 | 3.13E-04 |
| ↳ <a href="#">extracellular region part</a>         | <a href="#">3491</a> | <a href="#">8</a> | 1.99 | 4.02  | + | 1.52E-04 | 1.10E-02 |
| ↳↳ <a href="#">extracellular region</a>             | <a href="#">4302</a> | <a href="#">8</a> | 2.45 | 3.26  | + | 6.84E-04 | 4.08E-02 |
| ↳↳ <a href="#">extracellular space</a>              | <a href="#">3304</a> | <a href="#">8</a> | 1.88 | 4.25  | + | 1.01E-04 | 8.92E-03 |
| <a href="#">lamellipodium</a>                       | <a href="#">189</a>  | <a href="#">4</a> | .11  | 37.11 | + | 3.20E-06 | 8.11E-04 |
| ↳ <a href="#">cell leading edge</a>                 | <a href="#">394</a>  | <a href="#">4</a> | .22  | 17.80 | + | 5.52E-05 | 5.60E-03 |
| <a href="#">extracellular exosome</a>               | <a href="#">2095</a> | <a href="#">7</a> | 1.19 | 5.86  | + | 4.93E-05 | 5.88E-03 |
| ↳ <a href="#">extracellular vesicle</a>             | <a href="#">2115</a> | <a href="#">7</a> | 1.21 | 5.80  | + | 5.24E-05 | 5.90E-03 |
| ↳↳ <a href="#">extracellular organelle</a>          | <a href="#">2117</a> | <a href="#">7</a> | 1.21 | 5.80  | + | 5.27E-05 | 5.63E-03 |
| <a href="#">cytosol</a>                             | <a href="#">5077</a> | <a href="#">9</a> | 2.90 | 3.11  | + | 2.95E-04 | 1.93E-02 |
